# Supplementary material for: Snow depth time series retrieval by time-lapse photography: Finnish and Italian case studies
Source: Copernicus journal article supplement (doi:10.5194/tc-15-369-2021), 2021-01-27
Supplement: Supplementary file 1 [file tc-15-369-2021-supplement.pdf]

Supplement of The Cryosphere, 15, 369–387, 2021  
<https://doi.org/10.5194/tc-15-369-2021-supplement>  
© Author(s) 2021. This work is distributed under  
the Creative Commons Attribution 4.0 License.

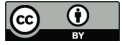

*Supplement of*

## **Snow depth time series retrieval by time-lapse photography: Finnish and Italian case studies**

**Marco Bongio et al.**

*Correspondence to:* Marco Bongio ([marco.bongio90@gmail.com](mailto:marco.bongio90@gmail.com)) and Ali Nadir Arslan ([ali.nadir.arslan@fmi.fi](mailto:ali.nadir.arslan@fmi.fi))

The copyright of individual parts of the supplement might differ from the CC BY 4.0 License.

|                                                     | METHODS                         | SPATIAL RESOLUTION                          | TEMPORAL RESOLUTION                                          | SPATIAL COVERAGE                                    | SD ACCURACY (m) | MAIN APPLICATIONS                                                                                                                                                                                   |
|-----------------------------------------------------|---------------------------------|---------------------------------------------|--------------------------------------------------------------|-----------------------------------------------------|-----------------|-----------------------------------------------------------------------------------------------------------------------------------------------------------------------------------------------------|
| A<br>i<br>r<br>b<br>o<br>r<br>n<br>e                | Photogrammetry (Airborne)       | DEM Spacing Grids: 5 m                      | Due to the high costs: 1 Year                                | Hydrological Basin Scale (100-500 Km <sup>2</sup> ) | < 0.01          | Hydrological- Hydropower Purpose (Amount of Snow in the Hydrological Basin)                                                                                                                         |
|                                                     | Photogrammetry (Drone)          | DEM Spacing Grids:< 10 · 10 <sup>-2</sup> m | Depending on the Design Survey and Purposes: Monthly         | Area of Few Km <sup>2</sup> (< 10 Km <sup>2</sup> ) | <0.1            | Avalanche Volume estimation, Snow Depth on Accumulation Basin of Mountain Glaciers.                                                                                                                 |
|                                                     | LIDAR                           | DEM Spacing Grids: 1 m                      | Due to the high costs: 1 Year                                | Hydrological Basin Scale (100-500 Km <sup>2</sup> ) | < 0.01          | Avalanche estimation, Snow Depth on Accumulation Area of Mountain Glaciers.                                                                                                                         |
| S<br>p<br>a<br>c<br>e<br>b<br>o<br>r<br>n<br>e      | Passive Microwave (e.g. AMSR-E) | 25 m – 50 Km                                | (Surveyed Period Different for Each Satellite) Weekly- Daily | Regional or Continental Scale                       | > 0.2           | Regional or Continental Scale Applications: Monitoring Snow depth in the European Alps or Northern Hemisphere, Estimate the Freshwater Resources, Climatological Purposes, Water Storage Anomalies. |
|                                                     | Active Microwave                | 25 m – 50 Km                                | (Surveyed Period Different for Each Satellite) Weekly- Daily | Regional or Continental Scale                       | > 0.2           |                                                                                                                                                                                                     |
| G<br>r<br>o<br>u<br>n<br>d<br>B<br>a<br>s<br>e<br>d | LIDAR                           | DEM Spacing Grid: 1 m                       | 1 Survey when requested                                      | Few Km <sup>2</sup> (< 10 Km <sup>2</sup> )         | < 0.01          | Avalanche estimate, Snow Depth on Accumulation Area of Mountain Glaciers.                                                                                                                           |
|                                                     | Time Lapse Photography          | Depending on the snow stakes number         | 1 Hour                                                       | Limited Area: Max 1 Km <sup>2</sup>                 | (0.01 ÷ 0.05)   | Real-time snow depth monitoring, especially for Avalanche forecast. Validate Manual Measurements                                                                                                    |
|                                                     | Manual (Rulers)                 | Spot Measurements                           | Generally Daily                                              | In-Situ or Snow Field                               | (0.01 ÷ 0.05)   | Validate Automatic Weather Sensor Estimations, avalanche risk monitoring                                                                                                                            |
|                                                     | Automatic Weather Station       | Spot Measurements                           | 1 minute                                                     | In-Situ                                             | 0.001           | Real-time snow depth monitoring, avalanche risk monitoring, support of water resource and flood management                                                                                          |

**Table S1. Snow depth measurements method overview.**

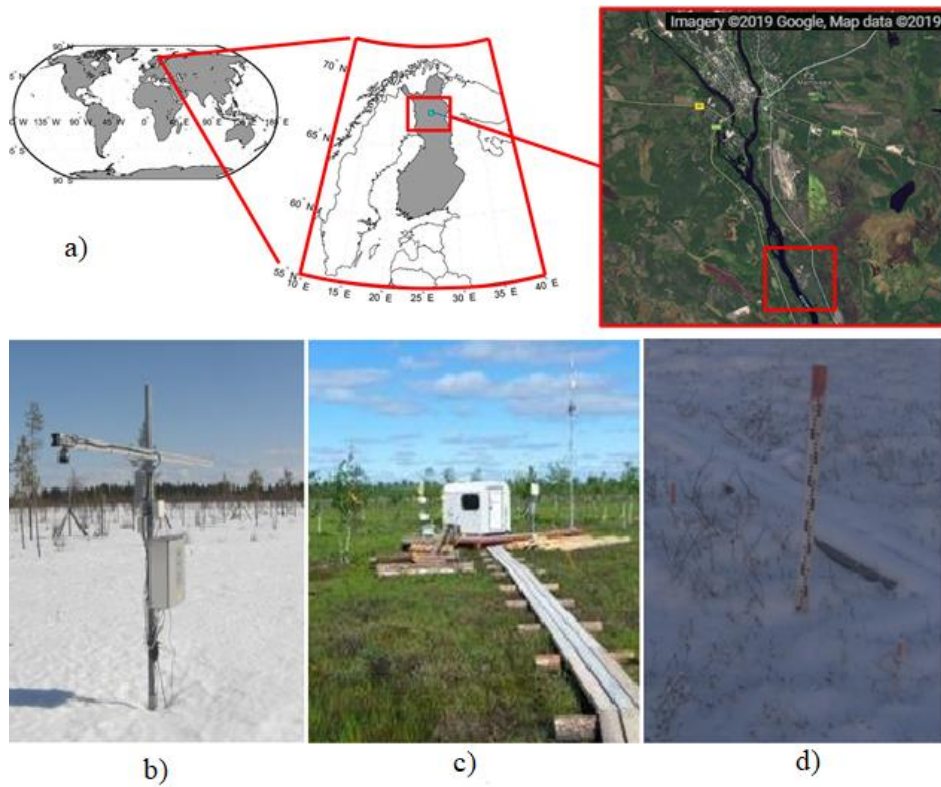

Figure S1. a) Arctic Space Center location - Sodankylä - Tähtelä - Finland (67.367 °N, 26.629 °E). Peatland Site (Sodankylä): Ultrasonic Snow Depth Sensor (b), Automatic weather station and camera (c), Snow Stake image from camera (d).

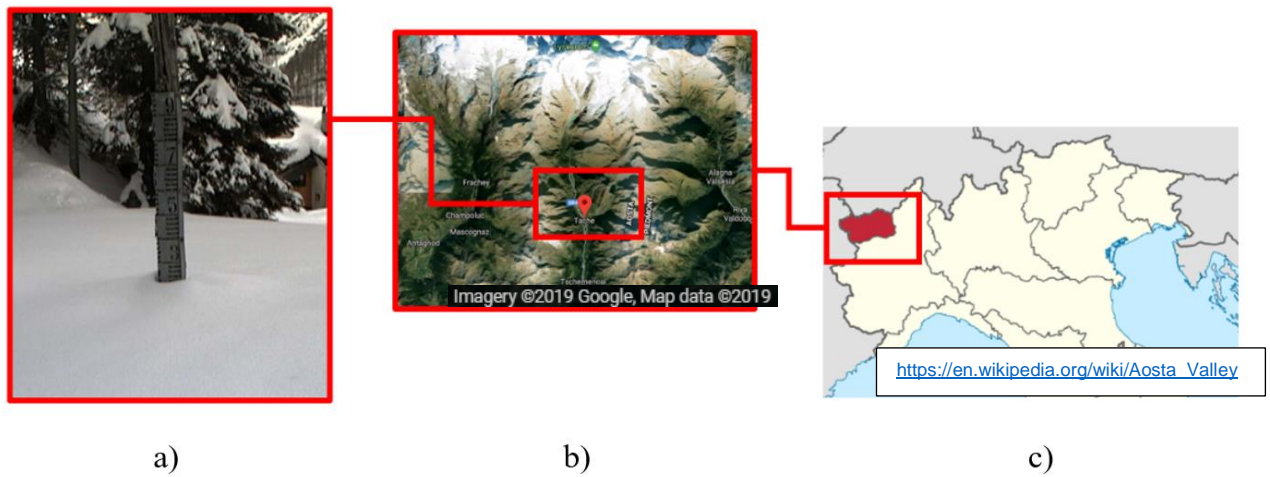

Figure S2. Gressoney La Trinitè Dejola (Historical Observatory): a) snow stake image from the camera, b) Territorial Framework of Gressoney, c) Valle D'Aosta Autonomous Region.

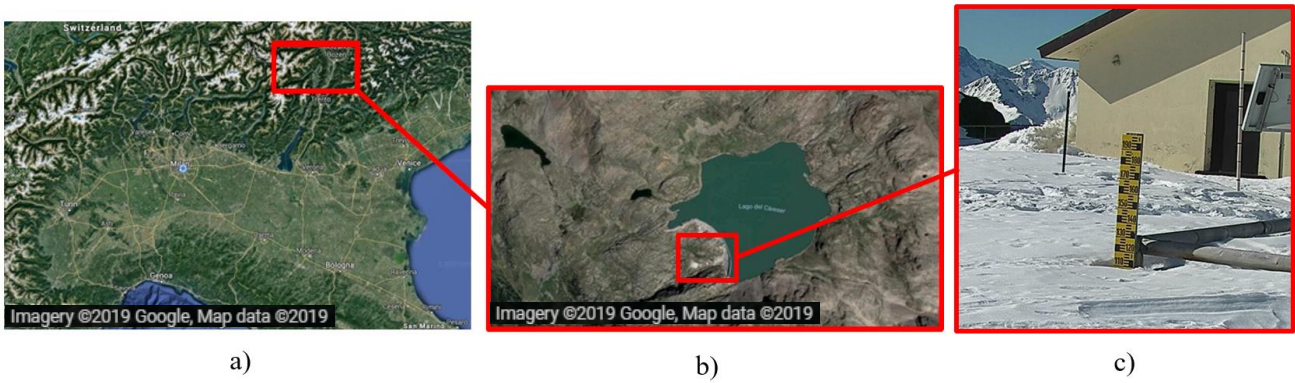

Figure S3. Careser dam case study: a) Trentino's region - Italian Alps, b) Location and Google Map view, c) snow stake camera's view.

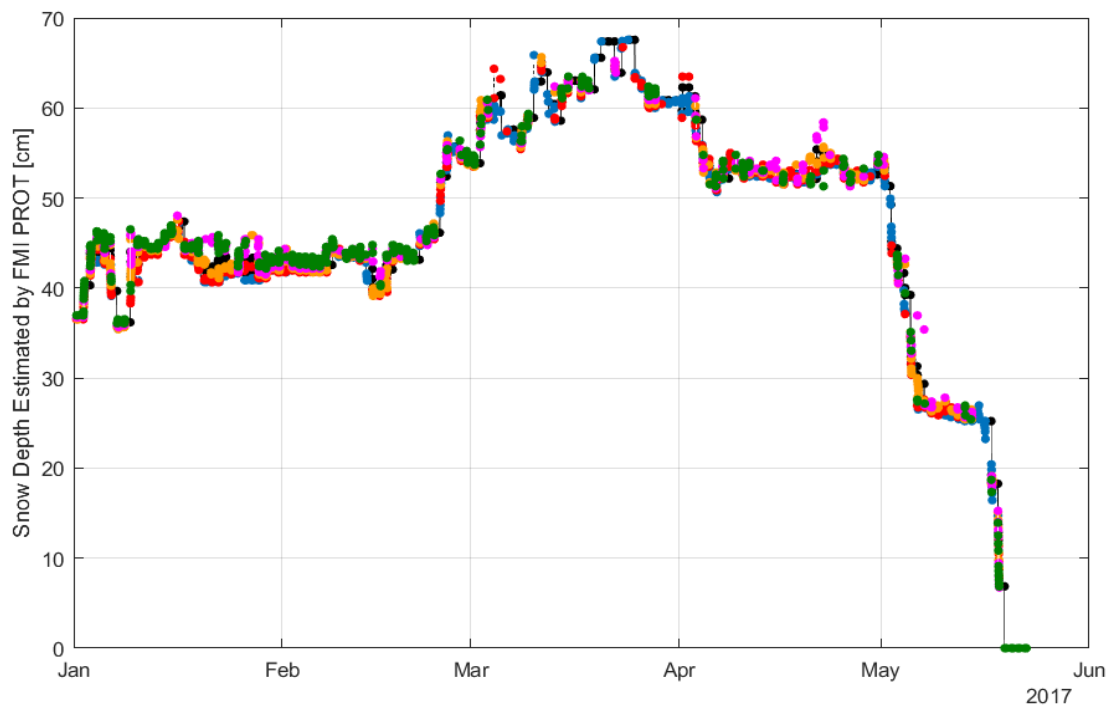

Figure S4. Sodankylä Peatland: Snow Depth Estimations by FMIPROT with 5 different values of sigma parameter from 1 to 5. In black dots we reported the mean value of these.
